# Supplementary material for: Newly diagnosed glioblastoma IDHwt patients treated with radiation, nivolumab, and BMS-986205
Source: Research Square preprint supplement (doi:10.21203/rs.3.rs-7567487/v1), 2025-09-25
Supplement: Supplementary file 1 [file 3af523a9373093fa652cc4fc.xlsx]

## Sheet: NMH Clinical Data
Patient ID	Age at time of trial enrollment	Sex	Race	Ethnicity	Dx	IDH1 status	Tumor Mutations	Hypermutated Profile yes/no	MGMT Methylation status	Mutational Burden	DNA Methylation Profiling	NGS	Survival (days)	Survival (months)	Survival (years)	Survival status	Tumor Recurrence	Re-Resections	Days from trial enrollment to date re-resection	Months from trial enrollment to date re-resection	Drugs at re-resection	TTF received while on trial	FFPE from initial Dx	FFPE at re-resection	Type of Resection
01-01-101	49	Male	Other	Non-hispanic	GBM	Wild-type	mutations in TERT promoter, PTEN, FANCA, MET and SLX4; amplifications of EGFR; hemizygous deletions of PTEN and NF2; homozygous deletions of CDKN2A and CDKN2B	No	Negative	Not reported	no	NMH	307	10	0	Deceased	No	No				No			gross total
01-01-103	59	Female	White	Non-hispanic	GBM	Wild-type	mutations in TERT promoter, NF1, PTEN, NOTCH2 and SMAD4; amplifications of KIT and PDGFRA; hemizygous deletions of BRCA2 and RB1; homozygous deletions of CDKN2A and CDKN2B	No	Negative	Not reported	no	NMH	264	8	0	Deceased	Yes	Yes	154	5	Not on trial treatment at time of re-resection. Received RT/TMZ prior to re-resection	No	Not in NSTB. Possibly available in clinical archives	Not in NSTB. Possibly available in clinical archives	biopsy and gross total
01-01-102	50	Male	White	Hispanic	GBM	Wild-type	mutation in TERT promoter; amplification of EGFR; deletions of CDKN2A/B, BRCA2 and RB1	No	Negative	Not reported	no	NMH	417	13	1	Deceased	Yes	Yes	132	4	Not on trial treatment at time of re-resection.	No	Not available. Surgery done at outside hospital.	Not in NSTB. Possibly available in clinical archives	gross total
01-01-104	47	Male	White	Non-hispanic	Astrocytoma, Grade 3- integrated diagnosis GBM	Wild-type	mutations in TERT promoter, EGFR, PALB2 and PIK3R1	No	Negative	Not reported	no	NMH	2102	69	5	Alive	No	No				Yes	Available in NSTB		subtotal
01-01-105	42	Male	White	Non-hispanic	GBM	Wild-type	BRAF p.V600E, mutation in ERCC2, near-tetraploid clone, relative whole chromosome gain of 7, relative whole chromosome loss of 10 (haploinsufficiency of tumor suppressor gene PTEN), relative loss of 17p (haploinsufficiency of the tumor suppressor gene TP53), homozygous deletion at 9p21.3 (bi-allelic loss of tumor suppressor genes CDKN2A/B)	No	Negative	Not reported	yes, 5/9/2022	NMH	1860	61	5	Deceased	No	Yes				No	Not in NSTB		subtotal
01-01-106	68	Female	Declined	Declined	GBM	Wild-type	mutations in TERT promoter, gain of chromosome 7, amplification of EGFR at 7p11.2, loss of chromosome 10 (haploinsufficiency of tumor suppressor gene PTEN, homozygous deletion at 9p21.3 (bi-allelic loss of tumor suppressor genes CDKN2A/B)	No	Negative	Not reported	no	NMH	216	7	0	Deceased	No	No				No			gross total
01-01-107	57	Male	White	Hispanic	GBM	Wild-type	mutations in PTEN, gain of chromosome 7, amplifications of TERT (5p15.33) and EGFR (7p11.2), chromothripsis of 6p and 9p; losses of 9p21.3 (bi-allelic loss of tumor suppressor genes CDKN2A/B), chromosome 10 (haploinsufficiency of tumor suppressor gene PTEN), 13q (haploinsufficiency of tumor suppressor gene RB1), chromosome 17 (haploinsufficiency of tumor suppressor genes TP53 and NF1)	No	Negative	Not reported	no	NMH	926	30	2	Deceased	No	No				Yes			subtotal
01-01-108	62	Male	White	Non-hispanic	GBM	Wild-type	mutations in TERT promoter and CHEK2, no mutations in IDH1 or IDH2, gain of chromosome 7, amplifications of PIK3CA (3q26.32), CDK4 (12q14.1) and MDM2 (12q15); losses of 9p21.3 (bi-allelic loss of tumor suppressor genes CDKN2A/B), 17p (haploinsufficiency of tumor suppressor gene TP53)	No	Negative	Not reported	no	NMH	540	17	1	Deceased	No	No				Yes			near total
01-01-109	70	Female	White	Non-hispanic	GBM	Wild-type	mutations in TERT promoter, PIK3CA and PTEN, copy number losses of CDKN2A/B (homozygous) and PTEN (hemizygous)	No	Negative	Not reported	no	NMH	113	3	0	Deceased	No	No				No			gross total
01-01-110	50	Male	White	Non-hispanic	GBM	Wild-type	mutations in TERT and NF1, loss-of-function deletion of CDKN2A/2B, amplification of MDM2, gain of chromosome 7, loss of chromosome 10 (homozygous deletion of PTEN), segmental loss at 13q (haploinsufficiency of RB1), stretch of copy-neutral loss of heterozygosity (CN-LOH) affecting chromosome 19	No	Negative	Not reported	no	NMH	1028	33	2	Deceased	No	No				Started TTF after EOT on trial			gross total
01-01-111	69	Female	White	Non-hispanic	GBM	Wild-type	Mutation in TERT promoter, Gain of chromosome 7, Loss of chromosomes 10 (haploinsufficiency of PTEN) and 14, Multiple segmental gains and losses, Chromothripsis affecting chromosome 1, Biallelic segmental loss at 9p (homozygous loss of CDKN2A/B), based on manual inspection	No	Negative	Not reported	no	NMH	96	3	0	Deceased	No	No				No			gross total
01-01-112	66	Female	White	Non-hispanic	GBM	Wild-type	Mutations in TERT promoter, RET, and TP53, Amplification of EGFR, Gain of chromosomes X, 5, 7, 19, and 20, Loss of chromosome 10 (haploinsufficiency of PTEN and CDKN2B), Multiple segmental gains and losses, Chromothripsis of chromosome 9p, Biallelic segmental loss at 9p21.3 (homozygous loss of CDKN2A)	No	Negative	Not reported	no	NMH	251	8	0	Deceased	No	No				No			biopsy
01-01-214	69	Male	White	Non-hispanic	GBM	Wild-type	Mutations in TERT promoter and TP53; No mutations in IDH1 or IDH2; Amplification of KIT; PTPRZ1-MET fusion; Gain of chromosomes 3, 7, 8, 9, and 17; Loss of chromosomes 10 (homozygous loss of PTEN) and 14; Multiple segmental gains and losses; Biallelic segmental loss at 9p (homozygous loss of CDKN2A, and loss of CDKN2B); Copy-neutral loss of heterozygosity affecting chromosome 22	No	Positive	Not reported	no	NMH	272	8	0	Deceased	No	No				Yes			gross total
01-01-215	55	Male	White	Non-hispanic	GBM	Wild-type	Mutations in TERT promoter, NF1, and PTEN; No mutations in IDH1 or IDH2; Gain of chromosomes 7 and 12; Loss of chromosomes 10 (haploinsufficiency of PTEN) and 13 (haploinsufficiency of RB1); Multiple segmental gains and losses - Biallelic segmental loss at 9p (homozygous loss of CDKN2A/B)	No	Positive	Not reported	no	NMH	1522	50	4	Deceased	Yes	Yes	105	3	Trial protocol and TMZ	Yes			gross total
38-01-213	72	Female	White	Non-hispanic	GBM	Wild-type	Mutation in TERT promoter; No mutations in IDH1 or IDH2; Amplification of CDK4 and MDM2; Gain of chromosome 7; Loss of chromosomes 10 (haploinsufficiency of PTEN) and 13 (haploinsufficiency of RB1); Multiple segmental gains and losses	No	Positive	Not reported	no	NMH	1127	37	3	Deceased	No	No				No			subtotal
38-01-216	60	Male	White	Non-hispanic	GBM	Wild-type	Mutations in TERT promoter and BRCA2; No mutations in IDH1 or IDH2; Amplification of EGFR; Gain of chromosomes 7 and 20; Loss of chromosome 10 (haploinsufficiency of PTEN); Multiple segmental gains and losses: Biallelic segmental loss at 9p (homozygous loss of CDKN2A/B); Segmental copy-neutral loss of heterozygosity affecting chromosome 19q	No	Positive	Not reported	no	NMH	818	26	2	Deceased	No	No				Started TTF after EOT on trial			gross total
01-01-217	71	Female	White	Non-hispanic	GBM	Wild-type	Mutations in ATRX, FANCI, and ROS1 (F2222S); No mutations in IDH1 or IDH2; Deletion of ARID1A and PTEN; Gain of chromosomes 5, 7 and 12p; Loss of chromosomes 1p, 10 and 17p (haploinsufficiency of PTEN and TP53); Biallelic segmental loss at 9p (homozygous loss of CDKN2A/B); Copy-neutral loss of heterozygosity affecting chromosome 9p	No	Positive	Not reported	no	NMH	1367	44	3	Deceased	No	No				No			biopsy
01-01-218	60	Male	White	Non-hispanic	GBM	Wild-type	Mutations in TERT, ATR, EGFR, NOTCH2 and NOTCH3; No mutations in IDH1 or IDH2; Amplification of EGFR; Deletion of CDKN2B; EGFR vIII; EGFR-PSPH fusion; Gain of chromosomes 3 and 7; Loss of chromosomes 9p and 10q (homozygous loss of CDKN2A/B and PTEN); Chromothripsis of chromosome 1p	No	Positive	Not reported	no	NMH	469	15	1	Deceased	No	No				Yes			gross total
